# Supplementary material for: Is resistance training intensity adequately prescribed to meet the demands of returning to sport following anterior cruciate ligament repair? A systematic review
Source: PubMed Central journal article supplement — BMJ Open Sport Exerc Med. 2021 Jul 29;7(3):e001144. doi: 10.1136/bmjsem-2021-001144 (PMC8323367; doi:10.1136/bmjsem-2021-001144), 2021-07-29
Supplement: bmjsem-2021-001144supp001.pdf [file bmjsem-2021-001144supp001.pdf]

## Supplementary Table 1

*Strength Exercise Intensity Compared with Return to Sport Outcome Measures*

| Study                             | Time Post-Op/RT Intensities & Graft Type | Strength LSI <sup>a</sup>                                                                                                      |                           |            | Hop Tests LSI <sup>a</sup> |     |       |       |
|-----------------------------------|------------------------------------------|--------------------------------------------------------------------------------------------------------------------------------|---------------------------|------------|----------------------------|-----|-------|-------|
|                                   |                                          | Quadriceps                                                                                                                     | Hamstrings                | Other      | SH                         | TH  | TCH   | Other |
| Berschin et al., 2014 [28]        | Weeks 2-5: 50-60% 1RM                    | Isometric - 70%                                                                                                                | Isometric - 75%           | -          | -                          | -   | -     | -     |
|                                   | Weeks 6-11: 60-80% 1RM                   | 60 <sup>os.-1</sup> - 62%                                                                                                      | 60 <sup>os.-1</sup> - 72% |            |                            |     |       |       |
|                                   | Graft: PT                                |                                                                                                                                |                           |            |                            |     |       |       |
| Bieler et al., 2014 [29]          | HI group                                 | -                                                                                                                              | -                         | Quadriceps | HI                         | HI  | -     | -     |
|                                   | Weeks 8-9: 20RM                          |                                                                                                                                |                           | Power:     | 69%                        | 75% |       |       |
|                                   | Weeks 10 & 11: 15RM                      |                                                                                                                                |                           | HI         | LI                         | LI  |       |       |
|                                   | Weeks 12-13: 12RM                        |                                                                                                                                |                           | 97.5%      | 65%                        | 68% |       |       |
|                                   | Weeks 14-20: 8RM                         |                                                                                                                                |                           | LI         |                            |     |       |       |
|                                   | LI group                                 |                                                                                                                                |                           | 83.5%      |                            |     |       |       |
|                                   | Graft: PT & HT                           |                                                                                                                                |                           |            |                            |     |       |       |
| Friedmann-Bette et al., 2018 [36] | Weeks 12-24: 8RM                         | CON/ECC                                                                                                                        | -                         | -          | -                          | -   | -     | -     |
|                                   | Graft: QT & HT                           | 60 <sup>os.-1</sup> - 80%<br>180 <sup>os.-1</sup> - 82%<br>CON/ECC+<br>60 <sup>os.-1</sup> - 78%<br>180 <sup>os.-1</sup> - 82% |                           |            |                            |     |       |       |
| Fukuda et al., 2013 [27]          | Weeks 1/2-26/27: 10RM & 70% 1RM          | EOKC                                                                                                                           | EOKC                      | -          | EOKC                       | -   | EOKC  | -     |
|                                   |                                          | 94.1%                                                                                                                          | 84.5%                     |            | 92.3%                      |     | 94%   |       |
|                                   |                                          | LOKC                                                                                                                           | LOKC                      |            | LOKC                       |     | LOKC  |       |
|                                   | Graft: HT                                | 89.5%                                                                                                                          | 87.4%                     |            | 94.9%                      |     | 92.5% |       |

| Study                      | Time post-op/RT Intensities & Graft Type | Strength LSI <sup>a</sup>                                                                    |                                                                                             |                                                                                                               | Hop Tests LSI <sup>a</sup> |    |            |                                          |
|----------------------------|------------------------------------------|----------------------------------------------------------------------------------------------|---------------------------------------------------------------------------------------------|---------------------------------------------------------------------------------------------------------------|----------------------------|----|------------|------------------------------------------|
|                            |                                          | Quadriceps                                                                                   | Hamstrings                                                                                  | Other                                                                                                         | SH                         | TH | TCH        | Other                                    |
| Kang et al., 2012 [32]     | Weeks 12-24: 70% 1RM                     | OKC (lb-ft)<br>60 <sup>os-1</sup> - 118 (65% ↑)<br>180 <sup>os-1</sup> - 80.4 (71%↑)         | OKC (lb-ft)<br>60 <sup>os-1</sup> - 69.5 (94% ↑)<br>180 <sup>os-1</sup> - 64.9 (45%↑)       | Squat (kg):<br>OKC<br>164.7 (17% ↑)                                                                           | -                          | -  | -          | -                                        |
|                            | Graft: not disclosed                     | CKC (lb-ft)<br>60 <sup>os-1</sup> - 98.1 (21% ↑)<br>180 <sup>os-1</sup> - 51.2 (160%↑)       | CKC (lb-ft)<br>60 <sup>os-1</sup> - 55.6 (80% ↑)<br>180 <sup>os-1</sup> - 40.8 (237%↑)      | Endurance (lb-ft):<br>OKC<br>Ext 80.4 (71%↑)<br>Flx 51.2 (65%↑)<br>CKC<br>Ext 64.9 (45%↑)<br>Flx 40.8 (237%↑) |                            |    |            |                                          |
| Kiniliki et al., 2014 [33] | Weeks 3-15: 5-50% 1RM                    | Early Onset (Nm/kg)<br>60 <sup>os-1</sup> - 68.8 (14%↑)<br>180 <sup>os-1</sup> - 77.6 (32%↑) | Early Onset (Nm/kg)<br>60 <sup>os-1</sup> - 97 (10%↑)<br>180 <sup>os-1</sup> - 103.9 (25%↑) | -                                                                                                             | Early Onset<br>91.1%       | -  | -          | Vertical<br>Hop:<br>Early Onset<br>89.2% |
|                            | Graft: HT                                | Standard (Nm/kg)<br>60 <sup>os-1</sup> - 69.5 (8%↑)<br>180 <sup>os-1</sup> - 63.5 (13%↑)     | Standard (Nm/kg)<br>60 <sup>os-1</sup> - 81.2 (9%↑)<br>180 <sup>os-1</sup> - 86.3 (18%↑)    |                                                                                                               | Standard<br>84.6%          |    |            | Early Onset<br>77.3%                     |
| Lepley et al., 2015 [34]   | Weeks 6-12: 60% 1RM                      | ECC<br>2.1 Nm/kg                                                                             | -                                                                                           | -                                                                                                             | -                          | -  | -          | -                                        |
|                            | Graft: PT & HT                           | NMES + ECC<br>1.7 Nm/kg<br>NMES<br>1.7 Nm/kg<br>Standard<br>1.5 Nm/kg                        |                                                                                             |                                                                                                               |                            |    |            |                                          |
| Perry et al., 2005 [30]    | Weeks 8-10: 20RM                         | -                                                                                            | -                                                                                           | -                                                                                                             | OKC<br>77%                 | -  | OKC<br>79% | Vertical<br>Hop:<br>OKC                  |
|                            | Weeks 11-13: 6RM                         |                                                                                              |                                                                                             |                                                                                                               | CKC<br>74%                 |    | CKC<br>81% | OKC<br>75%                               |
|                            | Graft: PT and HT                         |                                                                                              |                                                                                             |                                                                                                               |                            |    |            | CKC<br>78%                               |

| Study                     | Time post-op/RT Intensities & Graft Type                                                                    | Strength LSI <sup>a</sup>                   |                                             |                    | Hop Tests LSI <sup>a</sup> |       |      |             |
|---------------------------|-------------------------------------------------------------------------------------------------------------|---------------------------------------------|---------------------------------------------|--------------------|----------------------------|-------|------|-------------|
|                           |                                                                                                             | Quadriceps                                  | Hamstrings                                  | Other              | SH                         | TH    | TCH  | Other       |
| Risberg et al., 2007 [31] | Weeks 2-27: 50-80% 1RM (phase 3), 3 x 6 Reps (phase 4) <sup>b</sup><br><br>Graft: PT                        | ST                                          | ST                                          | -                  | ST                         | ST    | -    | Stairs Hop: |
|                           |                                                                                                             | 60 <sup>os.-1</sup> – 67.3%                 | 60 <sup>os.-1</sup> – 88.3%                 |                    | 81%                        | 83.1% |      | ST          |
|                           |                                                                                                             | 240 <sup>os.-1</sup> – 78%                  | 240 <sup>os.-1</sup> – 94.7%                |                    | NT                         | NT    |      | 79.8%       |
|                           |                                                                                                             | NT                                          | NT                                          |                    | 84.9%                      | 88.5% |      | NT          |
|                           |                                                                                                             | 60 <sup>os.-1</sup> – 79.1%                 | 60 <sup>os.-1</sup> – 86.3%                 |                    |                            |       |      | 79.8%       |
|                           | 240 <sup>os.-1</sup> – 79%                                                                                  | 240 <sup>os.-1</sup> – 90.8%                |                                             |                    |                            |       |      |             |
| Santos et al., 2018 [37]  | 2-5 years, 12 weeks: 10RM<br><br>Graft: PT                                                                  | Isometric - 94% <sup>c</sup>                | Isometric - 107% <sup>c</sup>               | -                  | 93%                        | 94%   | 102% | Figure-8    |
|                           |                                                                                                             | Con30 <sup>os.-1</sup> - 89% <sup>c</sup>   | Con30 <sup>os.-1</sup> - 105% <sup>c</sup>  |                    |                            |       |      | Hop:        |
|                           |                                                                                                             | Con120 <sup>os.-1</sup> - 93% <sup>c</sup>  | Con120 <sup>os.-1</sup> - 110% <sup>c</sup> |                    |                            |       |      | 101%        |
|                           |                                                                                                             | Ecc30 <sup>os.-1</sup> - 111% <sup>c</sup>  | Ecc30 <sup>os.-1</sup> - 128% <sup>c</sup>  |                    |                            |       |      |             |
|                           |                                                                                                             | Ecc120 <sup>os.-1</sup> - 104% <sup>c</sup> | Ecc120 <sup>os.-1</sup> - 125% <sup>c</sup> |                    |                            |       |      |             |
| Welling et al., 2019 [35] | Weeks 2-16: <50% 1RM<br>Weeks 17-31: 60-80% 1RM<br>Weeks 32-48: >80% 1RM <sup>d</sup><br><br>Graft: PT & HT | 3.9mo post-op: 72%                          | 3.9mo post-op: 89.3%                        | Quads PT/BW        | -                          | -     | -    | -           |
|                           |                                                                                                             | 6.6mo post-op: 84.7%                        | 6.6mo post-op: 96.6%                        | 3.9mo post-op: 2.4 |                            |       |      |             |
|                           |                                                                                                             | 9.7mo post-op: 94.1%                        | 9.7mo post-op: 97.9%                        | 6.6mo post-op: 2.9 |                            |       |      |             |
|                           |                                                                                                             |                                             |                                             | 9.7mo post-op: 3.2 |                            |       |      |             |
|                           |                                                                                                             |                                             |                                             |                    |                            |       |      |             |
|                           |                                                                                                             |                                             |                                             |                    |                            |       |      |             |

<sup>a</sup> LSI unless unit otherwise specified

<sup>b</sup> not specified if 6RM

<sup>c</sup> LSI comparison between pre-intervention non-injured leg and post-intervention injured leg

<sup>d</sup> Approximate weeks stated. Progression through stages of training varied depending on the individual (up to 4 weeks)

*Note:* In studies where only the raw data for return to sport outcome measures were reported, LSI's were calculated where possible; otherwise, percentage increases have been provided.

Abbreviations: PT, patellar tendon; <sup>os.-1</sup>, degrees per second; %, per cent; +, and; HI, high intensity; LI, low intensity; HT, hamstring tendon; QT, quadriceps tendon; CON, concentric; ECC, eccentric; ECC+, eccentric overload; EOKC/LOKC, early/late start open kinetic chain; OKC, open kinetic chain; CKC, closed kinetic chain; kg, kilograms; Ext, Extension; Flx, Flexion; ST, strength training; lb-ft, pounds per feet; mo, months, NM/kg, newton-meters per kilogram; NT, neuromuscular training; ↑, increased/improved; N, neuromuscular electrical stimulation; post-op, post-operative; Quads PT/BW, quadriceps peak torque normalised to bodyweight; RM, repetition maximum; SH, single-hop; TH, triple hop; TCH, triple crossover hop
