# Supplementary material for: Is resistance training intensity adequately prescribed to meet the demands of returning to sport following anterior cruciate ligament repair? A systematic review
Source: PubMed Central journal article supplement — BMJ Open Sport Exerc Med. 2021 Jul 29;7(3):e001144. doi: 10.1136/bmjsem-2021-001144 (PMC8323367; doi:10.1136/bmjsem-2021-001144), 2021-07-29
Supplement: bmjsem-2021-001144supp002.pdf [file bmjsem-2021-001144supp002.pdf]

## Supplementary Table 2

*General Characteristics of Studies*

| Study                 | Objective                                                                                                        | Downs and Black Score | Participants                                                                                          | Duration                      | Exercise Parameters                                                                                                                                                                                                                                                          | Outcome Measures                                                                                              | Results                                                                                                                                                                                                                                                                                                                                                                                    |
|-----------------------|------------------------------------------------------------------------------------------------------------------|-----------------------|-------------------------------------------------------------------------------------------------------|-------------------------------|------------------------------------------------------------------------------------------------------------------------------------------------------------------------------------------------------------------------------------------------------------------------------|---------------------------------------------------------------------------------------------------------------|--------------------------------------------------------------------------------------------------------------------------------------------------------------------------------------------------------------------------------------------------------------------------------------------------------------------------------------------------------------------------------------------|
| Berschin et al., 2014 | Investigate the effectiveness of WBV exercise in ACLR rehabilitation compared with a standard protocol           | 21 - Good             | 29/11 (m/f)<br>27.5yo (mean)<br>86.6 days from injury to surgery<br>1-week post-op                    | 2 sessions per week, 10 weeks | Weeks 2-5: 2-4 x 12-20 reps & 2-3 x 15-30 reps at 50-60% 1RM<br>Weeks 6-11: 2-4 x 8-12 at & 2-4 x 15-20 reps at 60-80% 1RM                                                                                                                                                   | Knee flx & ext strength<br>Balance<br>Lysholm scale                                                           | No difference in knee joint laxity between groups, within 2mm of contralateral side<br><br>Strength deficits improvements similar between groups<br><br>WBV superior to standard protocol to improve balance<br><br>Lysholm scores improved in both groups, no difference between groups                                                                                                   |
| Bieler et al., 2014   | Compare high-intensity resistance training as part of ACLR rehabilitation with low intensity resistance training | 25 - Good             | 31/19(m/f).<br>29.2yo (mean)<br>40.3mo (HRT) & 16.8mo (LRT) from injury to surgery<br>8 weeks post-op | 12 weeks                      | HI<br>Weeks 8-9: 1 x 20 – 3 x 15 reps, 20RM.<br>Weeks 10 & 11: 1 x 15 - 3 x 12 reps, 15RM<br>Weeks 12-13: 1 x 12 – 3 x 10 reps, 12RM.<br>Weeks 14-20: 1 x 8 – 3 x 8 reps, 8RM<br><br>LI<br>Weeks 8-9: 1 x 30 – 2 x 20 reps, 30RM.<br>Weeks 10-20: 1 x 20 – 2 x 20 reps, 20RM | Knee joint laxity<br>Leg extensor power<br>KOOS<br>Lysholm scale<br>Tegner scale<br>Single & triple hop tests | Knee joint laxity did not change from week 7 to 20, no difference between groups<br><br>↑ muscle power HI compared with LI at 14 & 20 weeks<br><br>No difference in hop test results<br><br>No difference between groups in self-assessed function.<br>Lysholm: 80 both groups<br>Tegner: HI 4, LI 3<br>KOOS: pre-surgery levels at 20 weeks both groups<br><br>No difference in adherence |

| Study                        | Objective                                                                                                                                                        | Downs and Black Score | Participants                               | Duration                      | Exercise Parameters                       | Outcome Measures                                                       | Results                                                                                                                                                                                                                                                                                                                                                                                                                                                                                                                                                                                                                                                                                    |
|------------------------------|------------------------------------------------------------------------------------------------------------------------------------------------------------------|-----------------------|--------------------------------------------|-------------------------------|-------------------------------------------|------------------------------------------------------------------------|--------------------------------------------------------------------------------------------------------------------------------------------------------------------------------------------------------------------------------------------------------------------------------------------------------------------------------------------------------------------------------------------------------------------------------------------------------------------------------------------------------------------------------------------------------------------------------------------------------------------------------------------------------------------------------------------|
| Friedmann-Bette et al., 2018 | Investigate the effects of concentric-eccentric overload strength training versus concentric-eccentric strength training on muscular regeneration following ACLR | 13 - poor             | 55m/13f<br>25yo (mean)<br>12 weeks post-op | 2 sessions per week, 12 weeks | 6 x 8 reps, 8RM.<br>90s rest between sets | Knee ext muscle strength<br>CSA quad femoris<br>Muscle biopsy sampling | <p>MCSA:<br/>- 4% ↑ (CON/ECC)<br/>- 11% ↑ (CON/ECC+)<br/>(no sig. difference)<br/>Graft type did not affect MSCA</p> <p>FCSA:<br/>↑ in FCSA for all fiber types after 12 weeks (no difference between groups)<br/>Greater type 1 fibers in ST group than in PT</p> <p>↑ in peak torque at both velocities (60<sup>o</sup>s<sup>-1</sup> &amp; 180<sup>o</sup>s<sup>-1</sup>) in both groups (no difference between groups)</p> <p>Type of graft effected peak torque - higher peak torque of semi-ten group</p> <p>Peak torque correlated with MCSA in both training groups</p> <p>↑ in type 1 fibres in CON/ECC+ group</p> <p>Myofibers expressing MHCneo ↑, higher in CON/ECC+ group</p> |
| Study                        | Objective                                                                                                                                                        | Downs and             | Participants                               | Duration                      | Exercise                                  | Outcome                                                                | Results                                                                                                                                                                                                                                                                                                                                                                                                                                                                                                                                                                                                                                                                                    |

|                       |                                                                                                                   | <b>Black Score</b>           |                                                                             |                                | <b>Parameters</b>                                                                   | <b>Measures</b>                                                                                                             |                                                                                                                                                                                                                                                                                                                                          |
|-----------------------|-------------------------------------------------------------------------------------------------------------------|------------------------------|-----------------------------------------------------------------------------|--------------------------------|-------------------------------------------------------------------------------------|-----------------------------------------------------------------------------------------------------------------------------|------------------------------------------------------------------------------------------------------------------------------------------------------------------------------------------------------------------------------------------------------------------------------------------------------------------------------------------|
| Fukuda et al., 2013   | Determine if early start on OKC exercises would promote a clinical improvement without causing laxity post-ACLR   | 26 - Excellent               | 29m/16f<br>25yo (mean)<br>12mo from injury to surgery<br>1-2 weeks post-op  | 3 sessions per week, 25 weeks  | 3 x 10 reps, 10RM and 3 x 15 reps at 70% of 1RM, and isometrics                     | Knee flx, ext strength<br>Anterior knee laxity<br>Pain<br>Single and triple hop tests, cross-over hop test<br>Lysholm scale | No difference in laxity between groups<br><br>EOKC group had improved quads strength at 19weeks, 25 weeks and 17 months compared with 12 weeks post-op. LOKC groups sig. difference in quads strength only at 17 months compared with 12 weeks post-op<br><br>No difference between groups in self-reported function, hop tests and pain |
| Kang et al., 2012     | Investigate the differences in strength and endurance of patients who performed OKC and CKC exercises post-ACLR.  | 15 - Fair                    | 24m/12f.<br>29yo (mean).<br>12 weeks post-op.                               | 3 sessions per week, 12 weeks. | 5 x 12 reps at 70% 1RM, 30 seconds rest between sets.                               | Knee flx, ext strength & endurance<br>Squat strength                                                                        | OKC group demonstrated greater difference in strength and endurance of extensor muscles<br><br>No difference in squat strength ↑                                                                                                                                                                                                         |
| Kiniliki et al., 2014 | Assess the functional outcomes of early onset progressive eccentric and concentric training in patients with ACLR | 16 - Fair                    | 31m/2f.<br>33.2yo (mean)<br>3.1mo from injury to surgery<br>3 weeks post-op | 3 sessions per week, 12 weeks  | 2-3 sets (2-3mins recovery between)<br>5% 1RM - 50% 1RM progressed gradually weekly | Knee flx and ext strength<br>Vertical jump<br>Single hop test<br>Lysholm scale<br>ACL-QoL                                   | No difference in isokinetic strength of knee extensors and flexors between study and control group<br><br>Vertical jump test, single hop for distance test, Lysholm knee scale, ACL-QoL demonstrated greater improvement in the study group compared with control                                                                        |
| <b>Study</b>          | <b>Objective</b>                                                                                                  | <b>Downs and Black Score</b> | <b>Participants</b>                                                         | <b>Duration</b>                | <b>Exercise Parameters</b>                                                          | <b>Outcome Measures</b>                                                                                                     | <b>Results</b>                                                                                                                                                                                                                                                                                                                           |

| Lepley et al., 2015 | Determine if a combination of NMES and eccentric exercise would be effective at improving quadriceps muscle strength in patients following ACLR | 15 - Fair             | 23m/13f.<br>21.6yo (mean)<br>78.6 days from injury to surgery<br>6 weeks post-op | 2 sessions weekly, 6 weeks | 4 x 10 reps, 60% 1RM, 2 min rests between sets | Quads activation and strength | <p>No difference in quads strength and activation between NMES + ECC and ECC only groups at RTP</p> <p>Strength deficits and QAF in NMES only group at RTP compared with healthy controls</p> <p>Healthy controls stronger than SR group at RTP</p> <p>NMES + ECC and ECC only groups had ↑ quads activation at RTP compared with SR and N only groups</p> <p>NMES + ECC and ECC only demonstrated greater strength gains compared with NMES only and SR groups</p> <p>ECC only ↑ quads strength compared with standard rehab at RTP</p> <p>Changes in quads strength related to increased quads activation</p> <p>No difference in quads strength and activation between healthy controls and NMES + ECC and ECC only at RTP</p> |
|---------------------|-------------------------------------------------------------------------------------------------------------------------------------------------|-----------------------|----------------------------------------------------------------------------------|----------------------------|------------------------------------------------|-------------------------------|-----------------------------------------------------------------------------------------------------------------------------------------------------------------------------------------------------------------------------------------------------------------------------------------------------------------------------------------------------------------------------------------------------------------------------------------------------------------------------------------------------------------------------------------------------------------------------------------------------------------------------------------------------------------------------------------------------------------------------------|
| Study               | Objective                                                                                                                                       | Downs and Black Score | Participants                                                                     | Duration                   | Exercise Parameters                            | Outcome Measures              | Results                                                                                                                                                                                                                                                                                                                                                                                                                                                                                                                                                                                                                                                                                                                           |

|                      |                                                                                                         |                              |                                                                                                                                          |                                 |                                                                                             |                                                                                                                                                               |                                                                                                                                                                                                                                                                                                                                                                            |
|----------------------|---------------------------------------------------------------------------------------------------------|------------------------------|------------------------------------------------------------------------------------------------------------------------------------------|---------------------------------|---------------------------------------------------------------------------------------------|---------------------------------------------------------------------------------------------------------------------------------------------------------------|----------------------------------------------------------------------------------------------------------------------------------------------------------------------------------------------------------------------------------------------------------------------------------------------------------------------------------------------------------------------------|
| Perry et al., 2005   | Compare the effects of a CKC versus an OKC training regimen on knee joint laxity and function post ACLR | 20 - Good                    | 37m/12f<br>33yo (mean)<br>CKC group - 811 days from injury to surgery<br>OKC group - 1340 days from injury to surgery<br>8 weeks post-op | 2 sessions per week, 6 weeks    | Wk 1-3: 3 x 20 reps, 20RM<br>Wk 4-6: 3 x 6 reps 6RM                                         | Knee joint laxity<br>Single, vertical, cross-over hop tests. Hughston clinic questionnaire<br>ROM<br>Knee circumference                                       | No difference in knee laxity between groups<br><br>No difference in self-reported function or functional hop tests between groups                                                                                                                                                                                                                                          |
| Risberg et al., 2007 | Determine the effect of an NT program vs a strength program on knee function following ACLR             | 22 - Good                    | 47m/27f<br>28.4yo (mean)<br>Injury occurred less than 3 years before surgery<br>2 weeks post-op                                          | 2-3 sessions per week, 6 months | Phase 3: 3 x 12-15 reps progressing to 3 x 8-12 reps at 50-80% 1RM<br>Phase 4: 3 x 6-8 reps | Cincinatti Knee Score<br>SF36<br>VAS pain and knee function<br>Knee flx, ext strength<br>Balance<br>Proprioception<br>Single, triple hop test, stair hop test | 91% adherence in ST group.<br>71% adherent in NT group (80% or > attendance)<br><br>No difference in knee joint laxity between groups at 6 months<br><br>No difference between the groups for any outcome measurements at 3 months<br><br>No difference in muscle strength variables<br><br>Decline in quads strength and hop tests from pre-op period to 6 months post-op |
| <b>Study</b>         | <b>Objective</b>                                                                                        | <b>Downs and Black Score</b> | <b>Participants</b>                                                                                                                      | <b>Duration</b>                 | <b>Exercise Parameters</b>                                                                  | <b>Outcome Measures</b>                                                                                                                                       | <b>Results</b>                                                                                                                                                                                                                                                                                                                                                             |

|                     |                                                                                                                       |           |                                         |                                         |                                                                                                                                                                       |                                                                            |                                                                                                                                                                                                                                                                                                                                                                                                                    |
|---------------------|-----------------------------------------------------------------------------------------------------------------------|-----------|-----------------------------------------|-----------------------------------------|-----------------------------------------------------------------------------------------------------------------------------------------------------------------------|----------------------------------------------------------------------------|--------------------------------------------------------------------------------------------------------------------------------------------------------------------------------------------------------------------------------------------------------------------------------------------------------------------------------------------------------------------------------------------------------------------|
| Santos et al., 2018 | Correlate possible gains in knee extensor and flexor torque generated by isokinetic training with hop tests post-ACLR | 14 - poor | 16n<br>2-5 years post-op                | 2 sessions per week, 12 weeks           | 3 x 10 reps, 10RM, 3-minute rest between sets                                                                                                                         | Knee ext and flx strength<br>Single, triple, crossover, figure 8 hop tests | Knee ext strength deficit in affected leg at pre-training<br><br>Knee ext strength deficits remained post-training<br><br>↑ in knee flx strength post-training compared with knee ext<br><br>SH, TH and F8 tests ↑ compared with pre-training<br><br>Moderate correlation between knee ext strength and single hop for AL, strong correlation for NAL<br><br>Moderate correlation between knee flx strength and SH |
| Welling et al. 2019 | Compare results of a RT protocol for soccer players after ACLR with healthy controls                                  | 15 – fair | 38m<br>24.2yo (mean)<br>2 weeks post-op | 2.6 sessions (mean) per week, 10 months | Phase 2: 2 x 15-25 reps (<50% 1RM)<br>Phase 3: 2-4 x 8-10 reps (60-80% 1RM) & 2 x 15-25 reps (<50% 1RM)<br>Phase 4: 5 x 3 reps (>80% 1RM) & 2 x 15-25 reps (<50% 1RM) | Peak quads and hamstring strength                                          | 4 months post-ACLR quads strength weaker than control<br><br>7 months post-ACLR no difference in quads or hamstring strength compared to control<br><br>10 months post-ACLR hamstring strength greater than control<br><br>10 months post-ACLR 65.8% passed quads & 76.3% passed hamstring LSI>90%                                                                                                                 |

Abbreviation:  $os^{-1}$ , degrees per second; %, percent; +, and; >, greater than; ACL-QoL, anterior cruciate ligament quality of life; WBV, whole body vibration; Sig., Significant; RCT, randomised controlled trial; m, male; f, female; yo, years old; flx, flexor; ext, extensor; RT, resistance training; HI, high intensity; LI, low intensity; ↑, increased/improved; CON, concentric; ECC, eccentric; ECC+, eccentric overload; CSA, cross-sectional area; MCSA, muscle cross-sectional area; FCSA, fascicle cross-

sectional area; PT, patellar tendon graft; ST, semitendinosis tendon graft; mm, millimetres; MHCneo, neonatal myosin heavy-chain (measure of muscle regeneration/remodelling); NMES, neuromuscular electrical stimulation; OKC, open kinetic chain; CKC, closed kinetic chain; EOKC/LOKC, early/late start open kinetic chain; NMES, neuromuscular electrical stimulation; RTP, return to play; SR, standard rehabilitation; Pre-op, pre-operative; Post-op, post-operative; QAF, quadriceps activation failure; ROM, range of movement; NT, neuromuscular training; s, seconds; ST, strength training; AL, affected limb; NAL, non-affected limb; Reps, repetitions; SH, single hop; TH, triple hop; F8, figure 8 hop
